# Supplementary material for: Early life stress causes persistent impacts on the microbiome of Atlantic salmon
Source: PubMed Central journal article supplement (PMC8600188; doi:10.1016/j.cbd.2021.100888), 2021-12
Supplement: mmc1.pdf [file mmc1.pdf]

**Table S1. Morphometric data collected throughout the experiment.**

|                               | Control A   | Control B   | Chronic stress A | Chronic stress B | Acute stress A | Acute stress B | Statistical significance     |
|-------------------------------|-------------|-------------|------------------|------------------|----------------|----------------|------------------------------|
| Hatching rate (%)             | 94.6        | 96.6        | 96.6             | 95.2             | 94.0           | 94.6           | $F_{3,2}=1.38, P=0.377$      |
| Post-hatch mortality rate (%) | 11.8        | 10.8        | 10.2             | 11.8             | 9.2            | 11.8           | $F_{3,2}=0.19, P=0.836$      |
| Mass (mg) 492 DD              | 187.4 ±6.2  | 185.5 ±10.0 | 183.3 ±3.5       | 185.5 ±7.8       | 183.3 ±6.2     | 189.6 ±4.6     | $F_{3,114}=0.37, P=0.718$    |
| Mass (mg) 748 DD              | 194.3 ±15.2 | 189.5 ±15.5 | 156.9 ±13.8      | 168.6 ±16.6      | 197.9 ±27.3    | 189.6 ±19.0    | $F_{3,114}=15.82, P=0.025^*$ |
| Mass (mg) 1019 DD             | 236.2 ±24.6 | 246.3 ±37.0 | 216.7 ±28.3      | 200.6 ±34.7      | 249.6 ±34.5    | 256.6 ±34.8    | $F_{3,114}=15.42, P=0.026^*$ |
| Mass (mg) 1323 DD             | 287.9 ±43.1 | 337.0 ±29.8 | 281.5 ±26.2      | 262.2 ±27.8      | 310.7 ±62.6    | 290.5 ±56.6    | $F_{3,114}=1.63, P=0.330$    |
| Mass (mg) 1532 DD             | 381.0 ±73.1 | 329.8 ±102  | 348.9 ±76.3      | 329.9 ±72.5      | 376.1 ±110     | 410.7 ±96.1    | $F_{3,114}=4.78, P=0.117$    |
| Length (cm) 1532 DD           | 3.54 ±0.19  | 3.58 ±0.28  | 3.50 ±0.31       | 3.39 ±0.26       | 3.47 ±0.26     | 3.62 ±0.28     | $F_{3,114}=1.36, P=0.381$    |
| Condition factor (1532 DD)    | 0.85 ±0.09  | 0.84 ±0.09  | 0.81 ±0.11       | 0.83 ±0.07       | 0.86 ±0.07     | 0.85 ±0.05     | $F_{3,114}=2.18, P=0.260$    |

Hatching rate and mortality rate; n=2 replicate tanks/ treatment. Mass and condition factor; n=20 individuals per tank, values presented are mean ±SD. Asterisks indicate significant stress effect (P< 0.05, using linear mixed effect models).

**Table S2. Significantly differentially abundant ASVs in the gut**

| ASV                   | Mean base abundance | Acute stress log2 fold change | Acute stress FDR | Chronic stress log2 fold change | Chronic stress FDR |
|-----------------------|---------------------|-------------------------------|------------------|---------------------------------|--------------------|
| G_Acinetobacter       | 49.92               | -4.94                         | 5.91E-12         | -1.41                           | 1.18E-01           |
| G_Plesiomonas         | 46.08               | -1.84                         | 3.90E-02         | -1.89                           | 4.50E-02           |
| G_Plesiomonas         | 30.05               | -1.79                         | 4.45E-02         | -2.08                           | 2.52E-02           |
| G_Plesiomonas         | 23.10               | -2.08                         | 1.48E-02         | -2.31                           | 1.09E-02           |
| G_Plesiomonas         | 18.26               | -2.33                         | 4.77E-03         | -2.47                           | 6.03E-03           |
| G_Acinetobacter       | 14.21               | -3.96                         | 2.31E-09         | -1.39                           | 9.01E-02           |
| G_Acinetobacter       | 13.32               | -3.77                         | 1.06E-08         | -1.66                           | 3.38E-02           |
| G_Acinetobacter       | 13.24               | -3.82                         | 6.63E-09         | -1.54                           | 5.13E-02           |
| G_Acinetobacter       | 11.16               | -3.47                         | 3.25E-07         | -1.63                           | 4.40E-02           |
| G_Gemmata             | 10.93               | 3.70                          | 3.25E-07         | 3.70                            | 1.92E-06           |
| G_Bacilloplasma       | 10.15               | 0.97                          | 2.44E-01         | 2.27                            | 6.03E-03           |
| G_Acinetobacter       | 9.97                | -3.05                         | 2.97E-05         | -1.60                           | 6.34E-02           |
| G_Acinetobacter       | 9.71                | -3.65                         | 6.63E-09         | -1.04                           | 2.48E-01           |
| G_Brevinema           | 9.60                | 0.28                          | 7.79E-01         | 1.88                            | 2.52E-02           |
| G_Photobacterium      | 9.52                | 2.16                          | 5.28E-03         | 0.71                            | 5.01E-01           |
| G_Exiguobacterium     | 9.37                | -2.88                         | 5.13E-05         | -2.06                           | 1.09E-02           |
| G_Acinetobacter       | 9.30                | -3.13                         | 7.51E-06         | -1.60                           | 5.13E-02           |
| G_Acinetobacter       | 9.30                | -3.56                         | 5.59E-08         | -0.70                           | 4.73E-01           |
| G_Acinetobacter       | 8.67                | -3.36                         | 6.59E-07         | -0.87                           | 3.65E-01           |
| G_Lactobacillus       | 8.08                | 2.40                          | 1.65E-03         | 0.04                            | 9.95E-01           |
| G_Acinetobacter       | 7.96                | -3.26                         | 1.50E-06         | -0.78                           | 4.34E-01           |
| G_Hyphomicrobium      | 7.55                | 3.33                          | 2.51E-06         | 3.33                            | 1.21E-05           |
| G_Acinetobacter       | 7.07                | -3.02                         | 1.37E-05         | -0.90                           | 3.55E-01           |
| F_Enterobacteriaceae  | 7.03                | -2.02                         | 1.28E-02         | -2.07                           | 1.67E-02           |
| G_Gemmata             | 6.84                | 3.23                          | 4.62E-06         | 3.23                            | 1.60E-05           |
| G_Acinetobacter       | 6.73                | -3.09                         | 2.07E-06         | -0.91                           | 3.13E-01           |
| G_Acinetobacter       | 6.73                | -3.20                         | 1.00E-06         | -0.43                           | 7.03E-01           |
| G_Acinetobacter       | 6.51                | -2.99                         | 7.51E-06         | -0.94                           | 3.10E-01           |
| F_Enterobacteriaceae  | 6.32                | -1.43                         | 7.78E-02         | -2.08                           | 1.12E-02           |
| G_Acinetobacter       | 5.88                | -2.56                         | 3.17E-04         | -1.34                           | 1.28E-01           |
| G_Clostridium         | 5.59                | -0.34                         | 7.19E-01         | -1.69                           | 3.38E-02           |
| G_Lactobacillus       | 5.47                | 2.77                          | 3.77E-05         | 1.55                            | 3.53E-02           |
| G_Rhodococcus         | 5.47                | 2.44                          | 1.10E-03         | 0.96                            | 3.10E-01           |
| F_Rhodobacteraceae    | 5.47                | 2.97                          | 2.37E-05         | 2.97                            | 7.88E-05           |
| G_Brevinema           | 5.36                | 2.74                          | 1.10E-04         | 1.88                            | 1.67E-02           |
| G_Reyranella          | 5.17                | 2.91                          | 3.15E-05         | 2.91                            | 9.30E-05           |
| G_Exiguobacterium     | 4.95                | -2.74                         | 5.27E-05         | -0.30                           | 7.98E-01           |
| G_Acetobacter         | 4.87                | -2.33                         | 1.79E-03         | -1.04                           | 3.04E-01           |
| G_Reyranella          | 4.72                | 2.79                          | 6.69E-05         | 2.79                            | 1.98E-04           |
| G_Acinetobacter       | 4.43                | -2.36                         | 1.16E-03         | -0.80                           | 4.34E-01           |
| G_Reyranella          | 4.28                | 2.67                          | 1.17E-04         | 2.67                            | 3.20E-04           |
| 1_Proteobacteria      | 4.20                | -2.19                         | 2.52E-03         | -1.06                           | 2.75E-01           |
| C_Gammaproteobacteria | 4.09                | 2.62                          | 1.54E-04         | 2.62                            | 3.83E-04           |
| F_Holosporaceae       | 3.94                | 2.58                          | 1.96E-04         | 2.58                            | 4.51E-04           |
| G_Pseudomonas         | 3.91                | -0.98                         | 2.44E-01         | -2.08                           | 1.02E-02           |
| G_Tatumella           | 3.83                | -2.13                         | 3.76E-03         | -0.81                           | 4.34E-01           |
| G_Bacilloplasma       | 3.65                | 2.08                          | 4.12E-03         | 1.01                            | 2.71E-01           |
| G_Acinetobacter       | 3.46                | -2.04                         | 4.77E-03         | -0.73                           | 4.73E-01           |
| G_Plesiomonas         | 3.27                | 0.02                          | 9.89E-01         | -2.17                           | 6.47E-03           |
| G_Flavobacterium      | 3.16                | -2.17                         | 2.04E-03         | 0.02                            | 9.95E-01           |
| G_Fimbriiglobus       | 2.97                | 2.21                          | 1.33E-03         | 2.21                            | 3.14E-03           |
| G_Lawsonella          | 2.90                | -2.04                         | 4.10E-03         | 0.02                            | 9.95E-01           |
| G_Photobacterium      | 2.90                | 1.50                          | 3.88E-02         | 0.12                            | 9.67E-01           |
| G_Vibrionimonas       | 2.83                | 1.82                          | 9.52E-03         | 0.96                            | 2.66E-01           |
| G_Streptococcus       | 2.72                | -1.80                         | 1.60E-02         | -0.75                           | 4.67E-01           |
| G_Pantoea             | 2.49                | 0.02                          | 9.89E-01         | -1.82                           | 1.83E-02           |
| G_SH-PL14             | 2.49                | 1.52                          | 4.30E-02         | 0.67                            | 4.73E-01           |
| G_Fimbriiglobus       | 2.49                | 1.96                          | 3.76E-03         | 1.96                            | 7.53E-03           |

|                 |      |       |          |       |          |
|-----------------|------|-------|----------|-------|----------|
| G_Paracoccus    | 2.42 | -1.78 | 1.38E-02 | 0.02  | 9.95E-01 |
| G_Mycoplasma    | 2.34 | 1.63  | 2.27E-02 | 1.13  | 1.65E-01 |
| G_Aeromonas     | 2.34 | -1.73 | 1.55E-02 | 0.01  | 9.95E-01 |
| G_Paracoccus    | 2.34 | -1.56 | 3.35E-02 | -0.41 | 7.07E-01 |
| G_Ulvibacter    | 2.31 | 1.67  | 1.55E-02 | 1.23  | 1.10E-01 |
| G_Rothia        | 2.27 | 0.01  | 9.89E-01 | -1.68 | 2.76E-02 |
| G_Pseudomonas   | 2.16 | -1.60 | 2.48E-02 | 0.01  | 9.95E-01 |
| F_Pirellulaceae | 2.16 | 1.70  | 1.48E-02 | 1.70  | 2.36E-02 |
| G_Enterococcus  | 2.08 | 1.64  | 1.81E-02 | 1.64  | 2.76E-02 |
| G_Mycoplasma    | 2.01 | 1.54  | 3.80E-02 | 1.54  | 4.99E-02 |
| G_Streptococcus | 2.01 | -1.48 | 3.88E-02 | 0.01  | 9.95E-01 |
| G_Anoxybacillus | 1.93 | 1.54  | 2.27E-02 | 1.54  | NA       |
| G_Reyranella    | 1.90 | 1.44  | 4.91E-02 | 1.44  | NA       |
| G_Roseococcus   | 1.82 | 1.39  | 4.98E-02 | 1.39  | NA       |
| G_Lactobacillus | 1.79 | 1.37  | 4.74E-02 | 1.37  | NA       |

**Table S3. Significantly differentially abundant ASVs in the skin**

| ASV                 | Mean base abundance | Acute stress log2 fold change | Acute stress FDR | Chronic stress log2 fold change | Chronic stress FDR |
|---------------------|---------------------|-------------------------------|------------------|---------------------------------|--------------------|
| G_Pseudomonas       | 451.15              | 1.67                          | 0.0016           | 0.37                            | 0.6138             |
| G_Acinetobacter     | 267.69              | -1.99                         | 8.52E-11         | 0.64                            | 0.4119             |
| G_Aeromonas         | 227.05              | -1.86                         | 0.0016           | 0.59                            | 0.4318             |
| G_Acinetobacter     | 220.11              | -2.26                         | 1.09E-04         | 0.18                            | 0.8735             |
| G_Acinetobacter     | 173.39              | -1.63                         | 4.49E-05         | 0.84                            | 0.2449             |
| G_Janthinobacterium | 157.01              | 1.27                          | 0.0015           | -0.17                           | 0.7840             |
| G_Staphylococcus    | 145.82              | 0.88                          | 0.0120           | 0.98                            | 0.2001             |
| G_Pseudorhodobacter | 22.87               | -1.99                         | 0.0098           | -1.47                           | 0.2976             |
| G_Mycoplasma        | 18.00               | -2.99                         | 3.81E-04         | 0.99                            | 0.7084             |
| G_Pseudomonas       | 15.48               | -4.47                         | 2.14E-11         | -0.04                           | 0.9921             |
| G_Acinetobacter     | 14.38               | -1.89                         | 0.0252           | 0.51                            | 0.6729             |
| G_Massilia          | 12.61               | 3.03                          | 3.81E-04         | 0.33                            | 0.8048             |
| G_Methylobacterium  | 10.83               | 1.93                          | 0.0307           | 1.06                            | 0.5940             |
| G_Gemmatimonas      | 10.53               | -1.78                         | 0.0374           | -2.01                           | 0.2245             |
| G_Massilia          | 10.49               | -1.77                         | 0.0374           | -2.81                           | 0.3746             |
| G_Sphingobium       | 10.35               | 2.96                          | 3.81E-04         | 0.84                            | 0.7902             |
| G_Verticia          | 9.81                | -3.62                         | 2.59E-06         | -0.70                           | 0.5122             |
| G_Polaromonas       | 9.28                | 2.36                          | 0.0066           | 0.87                            | 0.7911             |
| G_Paracoccus        | 9.10                | -2.15                         | 0.0123           | -2.16                           | 0.1834             |
| F_Burkholderiaceae  | 9.02                | -2.92                         | 3.81E-04         | -1.97                           | 0.3035             |
| F_Burkholderiaceae  | 7.91                | 3.30                          | 7.86E-05         | 3.27                            | 0.0336             |
| G_Streptococcus     | 7.58                | -2.01                         | 0.0167           | 1.00                            | 0.6867             |
| G_Rothia            | 7.55                | -1.97                         | 0.0123           | -1.74                           | 0.3095             |
| G_Bacillus          | 7.32                | -2.01                         | 0.0233           | -1.82                           | 0.2103             |
| G_Streptococcus     | 7.24                | 3.24                          | 7.90E-05         | 3.20                            | 0.0500             |
| G_Hymenobacter      | 6.91                | 2.68                          | 0.0010           | 0.65                            | 0.5124             |
| F_Burkholderiaceae  | 6.83                | -2.27                         | 0.0129           | -2.24                           | 0.2144             |
| G_Allorhizobium     | 6.83                | 2.64                          | 0.0013           | 0.65                            | 0.5217             |
| G_Pedobacter        | 6.80                | 1.82                          | 0.0374           | 0.32                            | 0.8071             |
| G_Hyphomicrobium    | 6.79                | -2.05                         | 0.0159           | -2.59                           | 0.1447             |
| G_Stenotrophomonas  | 6.42                | 2.11                          | 0.0146           | 1.16                            | 0.4997             |
| G_Acinetobacter     | 6.33                | 2.06                          | 0.0168           | -0.31                           | 0.8134             |
| G_Chryseobacterium  | 6.26                | -3.10                         | 7.86E-05         | -0.46                           | 0.7122             |
| G_Reyranella        | 6.15                | 2.32                          | 0.0066           | 0.22                            | 0.8905             |
| G_Virgibacillus     | 5.59                | 2.70                          | 0.0010           | 1.61                            | 0.2554             |
| F_Burkholderiaceae  | 5.51                | 2.00                          | 0.0160           | 2.70                            | 0.4649             |
| G_Corynebacterium   | 5.47                | -1.98                         | 0.0120           | -2.49                           | 0.4352             |
| G_Chryseobacterium  | 5.28                | -2.62                         | 0.0015           | -1.05                           | 0.5940             |

|                       |      |       |          |       |        |
|-----------------------|------|-------|----------|-------|--------|
| G_Rickettsiella       | 5.17 | -2.86 | 3.81E-04 | -0.03 | 0.9921 |
| F_Burkholderiaceae    | 5.13 | 2.27  | 0.0062   | 2.70  | 0.4352 |
| F_Burkholderiaceae    | 5.13 | -2.45 | 0.0034   | -1.39 | 0.6105 |
| G_Legionella          | 4.98 | 2.47  | 0.0028   | 1.17  | 0.8571 |
| G_Aquabacterium       | 4.95 | -2.49 | 0.0031   | -1.09 | 0.5819 |
| F_Burkholderiaceae    | 4.87 | -2.77 | 6.15E-04 | -0.03 | 0.9921 |
| G_Agitococcus         | 4.87 | -1.94 | 0.0227   | -2.03 | 0.2144 |
| G_Nitrospira          | 4.42 | -2.30 | 0.0062   | -1.23 | 0.8571 |
| F_Enterobacteriaceae  | 4.42 | -2.72 | 4.00E-04 | -0.02 | 0.9921 |
| G_Pseudomonas         | 4.23 | -2.62 | 0.0010   | -0.02 | 0.9921 |
| F_Moraxellaceae       | 4.15 | -1.69 | 0.0435   | -2.00 | 0.2144 |
| G_Neisseria           | 3.81 | 2.26  | 0.0062   | 1.47  | 0.3432 |
| O_Babeliales          | 3.77 | 2.01  | 0.0144   | 0.66  | 0.5052 |
| G_Pseudomonas         | 3.74 | -1.84 | 0.0252   | -0.69 | 0.5122 |
| F_Burkholderiaceae    | 3.70 | -2.08 | 0.0123   | -1.09 | 0.5493 |
| G_Alkanindiges        | 3.58 | 2.43  | 0.0015   | 2.41  | 0.1447 |
| G_Hyphomicrobium      | 3.55 | -1.98 | 0.0149   | -1.20 | 0.4286 |
| G_Pedobacter          | 3.32 | 2.12  | 0.0079   | 1.43  | 0.3296 |
| G_Persicitalea        | 3.24 | -2.08 | 0.0120   | -1.02 | 0.5977 |
| G_Paludibacter        | 3.17 | -1.88 | 0.0167   | 0.25  | 0.8690 |
| G_Lactobacillus       | 3.06 | 2.19  | 0.0055   | 2.17  | 0.1678 |
| G_Clostridium         | 3.06 | 2.21  | 0.0038   | 2.20  | 0.1686 |
| G_Acinetobacter       | 3.02 | -1.70 | 0.0430   | -1.11 | 0.5226 |
| G_Pseudonocardia      | 2.87 | -2.09 | 0.0080   | -0.02 | 0.9921 |
| G_Hydrogenophaga      | 2.87 | -1.96 | 0.0123   | -0.48 | 0.6735 |
| G_Mesorhizobium       | 2.79 | 1.76  | 0.0282   | 0.93  | 0.5940 |
| F_NS11-12             | 2.76 | -2.04 | 0.0085   | -0.02 | 0.9921 |
| G_Dolosigranulum      | 2.76 | -1.90 | 0.0146   | 0.08  | 0.9921 |
| O_NB1-j               | 2.72 | -2.01 | 0.0107   | -0.02 | 0.9921 |
| G_Blastocatella       | 2.68 | 1.65  | 0.0406   | 0.76  | 0.8171 |
| G_Schlegelella        | 2.64 | 1.99  | 0.0098   | 1.97  | 0.3308 |
| F_Terrimicrobiaceae   | 2.61 | 1.93  | 0.0146   | 1.91  | 0.2144 |
| G_Shewanella          | 2.60 | -1.95 | 0.0120   | -0.01 | 0.9921 |
| G_Alloiococcus        | 2.57 | 1.91  | 0.0149   | 1.89  | 0.2225 |
| G_Finegoldia          | 2.49 | -1.67 | 0.0374   | -0.56 | 0.6107 |
| O_Nostocales          | 2.45 | 1.87  | 0.0136   | 1.86  | 0.2144 |
| G_Pseudomonas         | 2.42 | 1.76  | 0.0361   | 1.74  | 0.1895 |
| F_Burkholderiaceae    | 2.41 | -1.83 | 0.0167   | -0.01 | 0.9921 |
| G_Nevskia             | 2.34 | -1.59 | 0.0443   | -0.49 | 0.6646 |
| F_Verrucomicrobiaceae | 2.34 | -1.76 | 0.0233   | -0.01 | 0.9921 |
| G_Flavobacterium      | 2.34 | 1.76  | 0.0233   | 1.75  | 0.3558 |
| G_Exiguobacterium     | 2.30 | 1.74  | 0.0252   | 1.73  | 0.3808 |
| G_Arenimonas          | 2.19 | -1.66 | 0.0332   | -0.01 | 0.9921 |
| G_Actinobacillus      | 2.19 | -1.66 | 0.0332   | -0.01 | 0.9921 |
| G_Chryseobacterium    | 2.15 | 1.63  | 0.0361   | 1.62  | 0.1895 |
| F_Burkholderiaceae    | 2.15 | -1.77 | 0.0233   | -0.12 | 0.9573 |
| G_AAP99               | 2.08 | 1.57  | 0.0423   | 1.56  | 0.2157 |
| G_Cereibacter         | 2.08 | 1.53  | 0.0496   | 1.40  | 0.3296 |
| G_Perlucidibaca       | 2.04 | -1.55 | 0.0406   | -0.01 | 0.9921 |

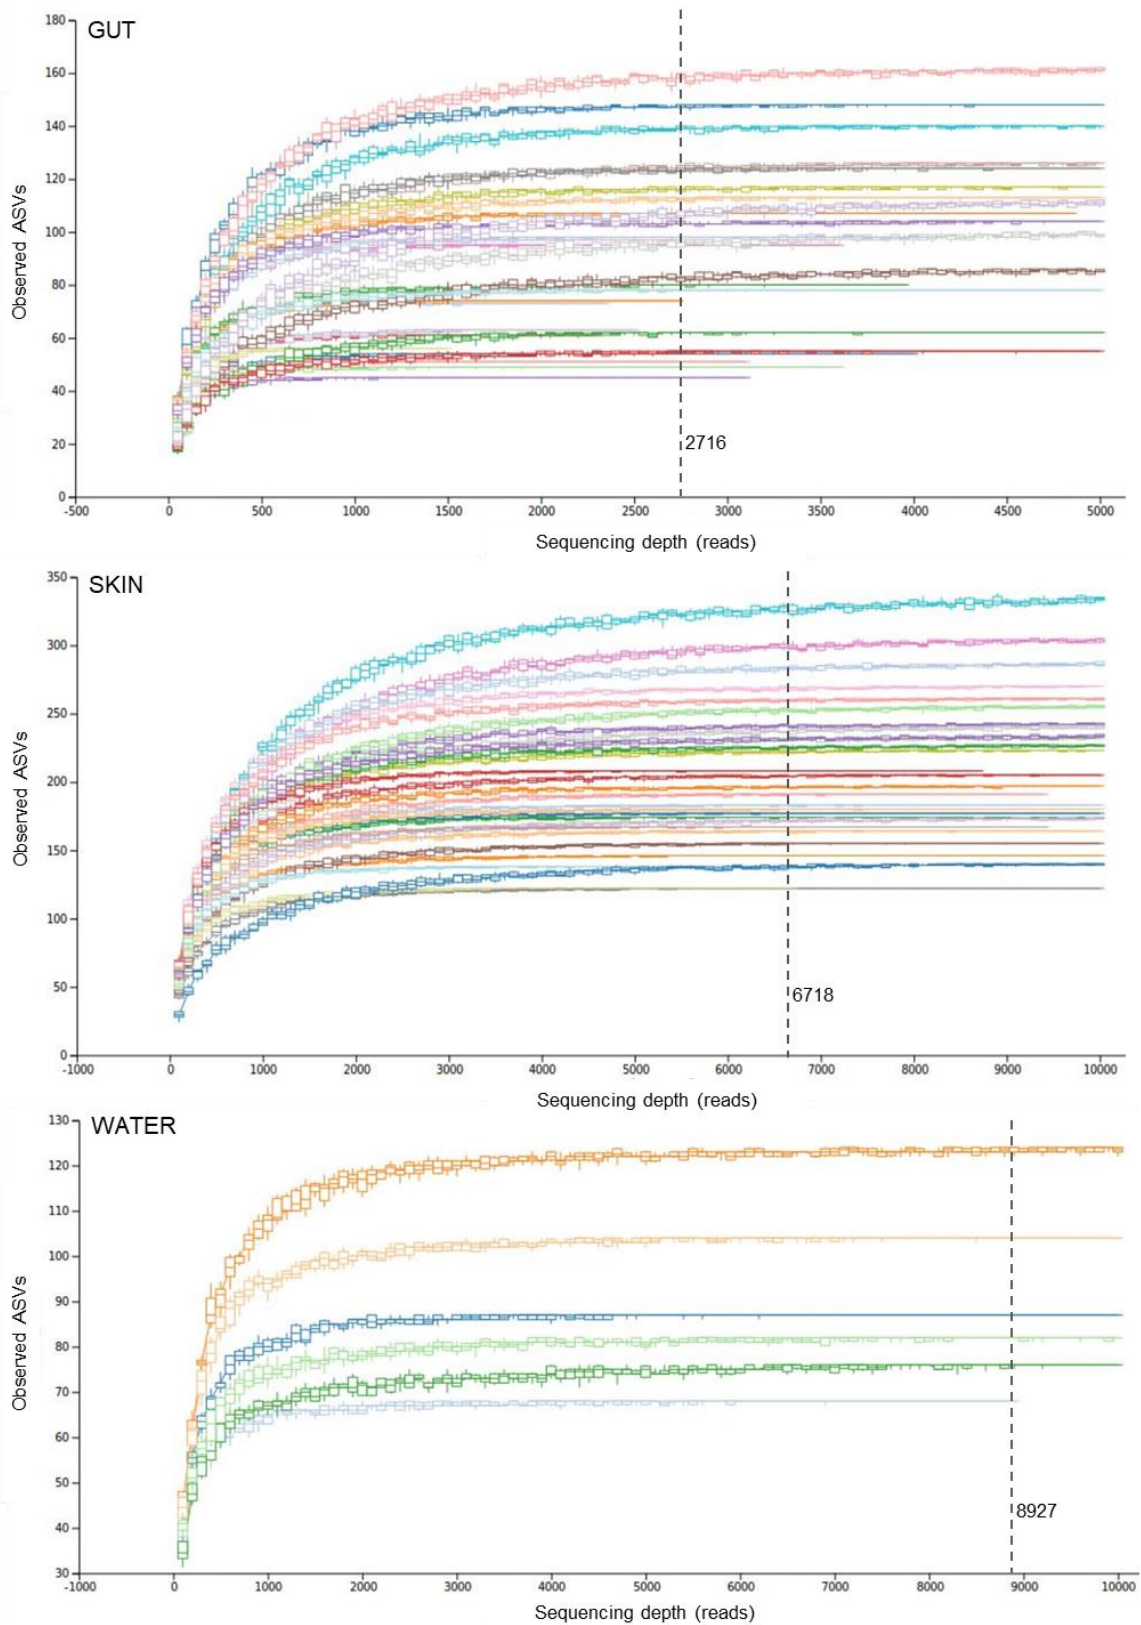

**Figure S1.** Rarefaction curves for gut, skin and water samples, showing number of observed ASVs at sequential 100 read sampling steps. The minimum read depth, at which subsampling was performed is indicated with a dashed line in each case.
